# Supplementary material for: The Impact of Lactobacillus casei on the Composition of the Cecal Microbiota and Innate Immune System Is Strain Specific
Source: PubMed Central journal article supplement (PMC4887021; doi:10.1371/journal.pone.0156374), 2016-05-31
Supplement: pone.0156374.s001.pdf [file pone.0156374.s001.pdf]

**A)**

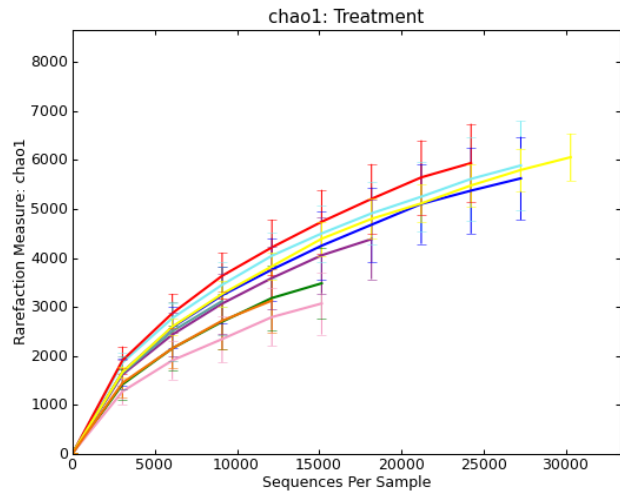

**B)**

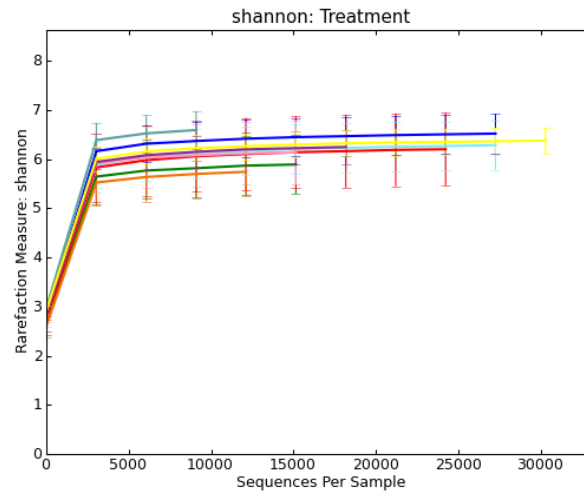

- 12A
- 32G
- 32G.UV
- ATCC.334
- BL23
- CRF28
- Control
- M36
- UW.1

**Figure S1.** Alpha rarefaction plots based on Chao1 (A) and Shannon index (B).
