# Supplementary material for: The Impact of Lactobacillus casei on the Composition of the Cecal Microbiota and Innate Immune System Is Strain Specific
Source: PubMed Central journal article supplement (PMC4887021; doi:10.1371/journal.pone.0156374), 2016-05-31
Supplement: pone.0156374.s002.pdf [file pone.0156374.s002.pdf]

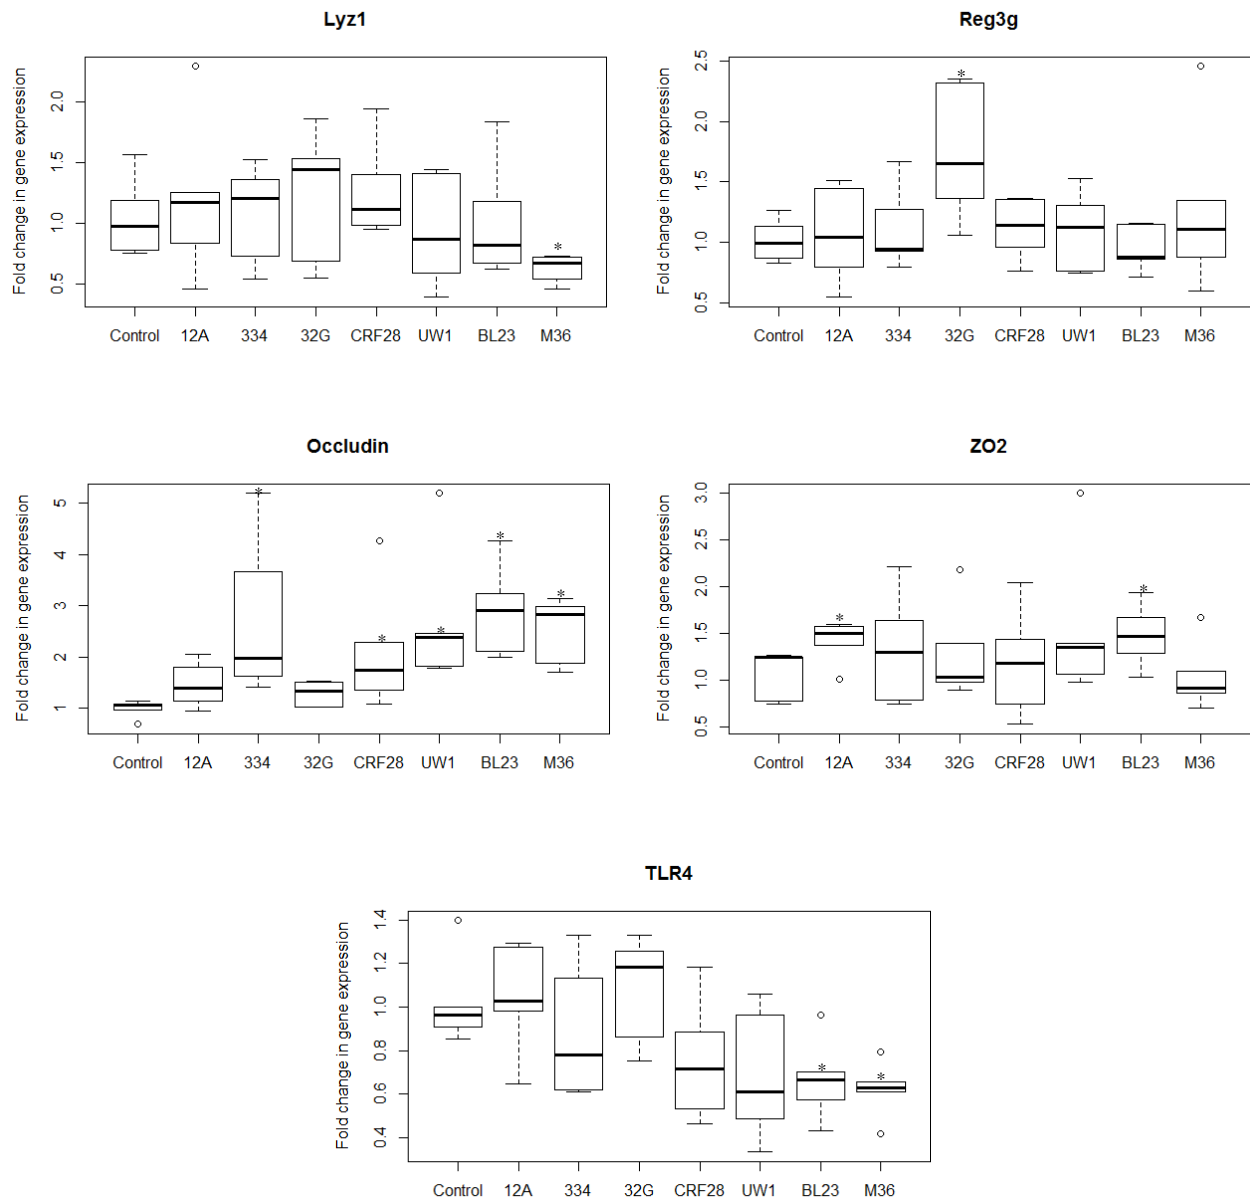

**Figure S2.** Fold change in gene expression of antimicrobials, tight junction proteins, and pattern recognition receptor in the ileum of mice administered *L. casei* 12A, ATCC 334, 32G, CRF28, UW-1, BL23 or M36. The strains were administered 1 dose ( $10^8$  CFU/ mouse) daily for 1 week and sacrificed 3.5h after the last dose; \*  $p < 0.05$ : significant differences from the control, (n: 6/group).
