# Supplementary material for: The Impact of Lactobacillus casei on the Composition of the Cecal Microbiota and Innate Immune System Is Strain Specific
Source: PubMed Central journal article supplement (PMC4887021; doi:10.1371/journal.pone.0156374), 2016-05-31
Supplement: pone.0156374.s004.pdf [file pone.0156374.s004.pdf]

**Table S2.** Primers used in qPCR analysis

| <b>Gene</b>     | <b>Forward</b>                | <b>Reverse</b>                | <b>Reference</b>       |
|-----------------|-------------------------------|-------------------------------|------------------------|
| <i>Occludin</i> | 5'-CCCTGACCACTATGAAACAG-3'    | 5'-TTGATCTGAAGTGATAGGTG-3'    | Corridoni et al., 2012 |
| <i>ZO-1</i>     | 5'-CCTAAGACCTGTAACCATCT-3'    | 5'-CTGATAGA-TATCTGGCTCCT-3'   | Corridoni et al., 2012 |
| <i>ZO-2</i>     | 5'-CTAGACCCCCAGAGCCCCAGAAA-3' | 5'-TCGCAGGAGTCCACGCATACAAG-3' | Ukena et al., 2007     |
