# Supplementary material for: The Impact of Lactobacillus casei on the Composition of the Cecal Microbiota and Innate Immune System Is Strain Specific
Source: PLoS One. 2016 May 31;11(5):e0156374. doi: 10.1371/journal.pone.0156374 (PMC4887021; doi:10.1371/journal.pone.0156374)
Supplement: S1 Table — (PDF) [file pone.0156374.s003.pdf]

**Table S1.** Bacterial phyla detected in cecum content of mice administered saline (control) or *Lactobacillus casei* strains<sup>b</sup>.

| Taxon                              | Percentage (mean ± SE) <sup>bc</sup> |             |                  |                  |                    |                  |                  |                   |
|------------------------------------|--------------------------------------|-------------|------------------|------------------|--------------------|------------------|------------------|-------------------|
|                                    | Control                              | 12A         | 32G              | ATCC334          | BL23               | CRF28            | M36              | UW1               |
| <i>Bacteroidetes</i>               | 31.8 ± 8.5                           | 37.2 ± 14.7 | 29.2 ± 4.8       | 35.2 ± 7.4       | <b>19.8 ± 10.1</b> | 36.5 ± 9.1       | 37.6 ± 9.4       | <b>20.5 ± 6.2</b> |
| <i>Firmicutes</i>                  | 65.7 ± 8.2                           | 61.0 ± 14.4 | 68.7 ± 4.0       | 63.2 ± 7.2       | <b>79.5 ± 10.1</b> | 61.0 ± 9.6       | 60.2 ± 9.6       | <b>78.0 ± 6.1</b> |
| <i>Tenericutes</i>                 | 1.8 ± 1.8                            | 1.5 ± 0.6   | 1.0 ± 1.4        | 1.3 ± 0.6        | <b>0.3 ± 0.3</b>   | 1.5 ± 1.0        | 1.2 ± 1.4        | <b>0.6 ± 0.4</b>  |
| <i>Proteobacteria</i>              | 0.1 ± 0.3                            | 0.0 ± 0.0   | 0.0 ± 0.0        | 0.0 ± 0.0        | 0.0 ± 0.0          | 0.0 ± 0.0        | 0.0 ± 0.0        | 0.0 ± 0.0         |
| <i>Verrucomicrobia</i>             | 0.1 ± 0.2                            | 0.0 ± 0.0   | 0.0 ± 0.0        | 0.0 ± 0.0        | BQL                | 0.0 ± 0.0        | 0.0 ± 0.0        | 0.0 ± 0.0         |
| <i>Bacteria;Other</i>              | 0.4 ± 0.2                            | 0.4 ± 0.1   | <b>1.0 ± 0.3</b> | <b>0.2 ± 0.1</b> | 0.4 ± 0.1          | <b>1.0 ± 0.4</b> | <b>0.9 ± 0.2</b> | <b>1.0 ± 0.2</b>  |
| <i>Actinobacteria</i>              | 0.0 ± 0.0                            | 0.0 ± 0.0   | 0.0 ± 0.0        | 0.0 ± 0.0        | 0.0 ± 0.0          | 0.0 ± 0.0        | 0.0 ± 0.0        | 0.0 ± 0.0         |
| <i>Deferribacteres</i>             | 0.0 ± 0.0                            | 0.0 ± 0.0   | 0.0 ± 0.0        | BQL              | 0.0 ± 0.0          | BQL              | 0.0 ± 0.0        | BQL               |
| <i>Cyanobacteria</i>               | 0.0 ± 0.0                            | 0.0 ± 0.0   | BQL              | BQL              | BQL                | BQL              | 0.0 ± 0.0        | BQL               |
| <i>TM7</i>                         | 0.0 ± 0.0                            | BQL         | 0.0 ± 0.0        | BQL              | BQL                | BQL              | BQL              | BQL               |
| <i>Thermi</i>                      | BQL                                  | BQL         | 0.0 ± 0.0        | BQL              | 0.0 ± 0.0          | BQL              | BQL              | 0.0 ± 0.0         |
| Number of alterations <sup>d</sup> | -                                    | -           | 1                | 1                | 3                  | 1                | 1                | 4                 |

<sup>a</sup>The detection limit was 0.00009 and this value was used to calculate the p-value.

<sup>b</sup>Mice were administered 1 dose (10<sup>8</sup> CFU/mouse/day) daily of *L. casei* strains for 1 week and sacrificed 3.5h after the last dose.

<sup>c</sup>Phyla that differ from control within each group are shown in bold (p≤0.05).

<sup>d</sup>The number of genera that differed from the control for that treatment.

IS: Incertae Sedis.

BQL: Below quantifiable limit.
